# Supplementary material for: Arginine methylation of hnRNPUL1 regulates interaction with NBS1 and recruitment to sites of DNA damage
Source: PubMed Central journal article supplement (PMC4447065; doi:10.1038/srep10475), 2015-05-28

## Figure 2A

$\alpha$ -ASYM25b

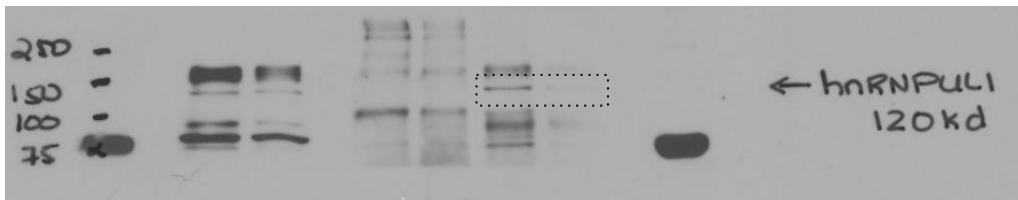

$\alpha$ -UL1

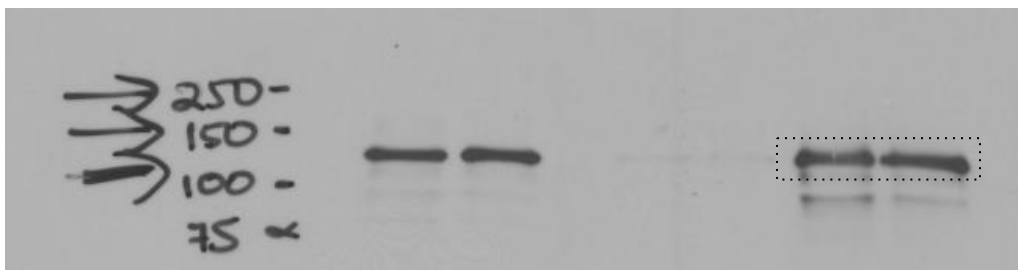

$\alpha$ -PRMT1

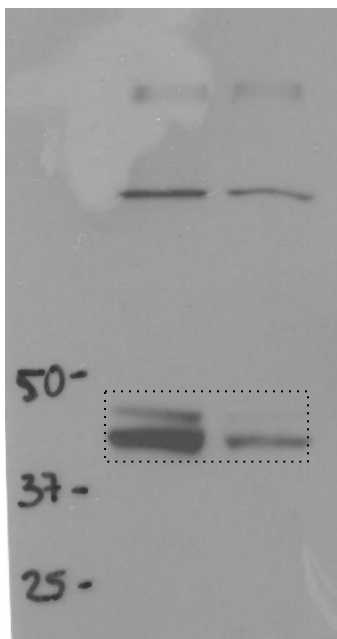

$\alpha$ -tubulin

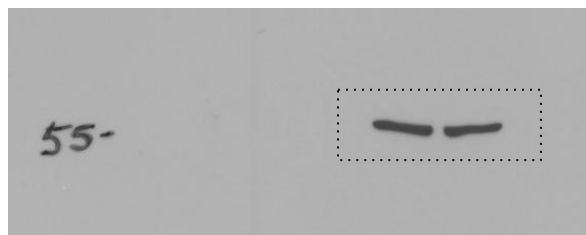

Figure 2A



Arginine methylation of hnRNPUL1 regulates interaction with NBS1 and recruitment to sites of DNA damage

G. Gurnathan, Z. Yu, Y. Coulombe, J. Y. Masson, and S. Richard

Figure 3A

$\alpha$ -GFP

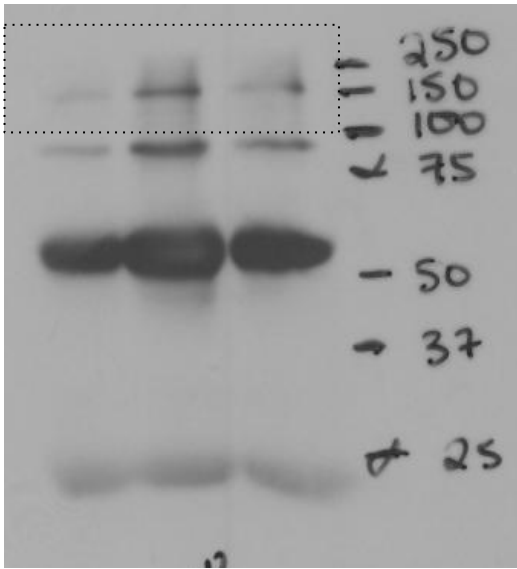

$\alpha$ -FLAG

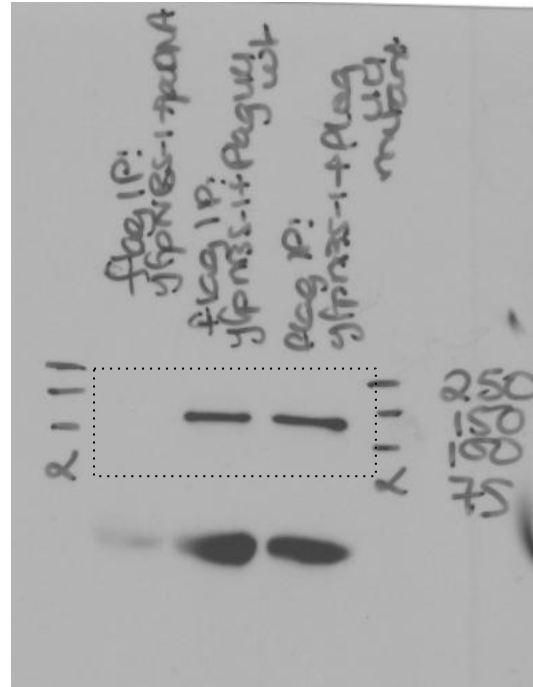

$\alpha$ -GFP

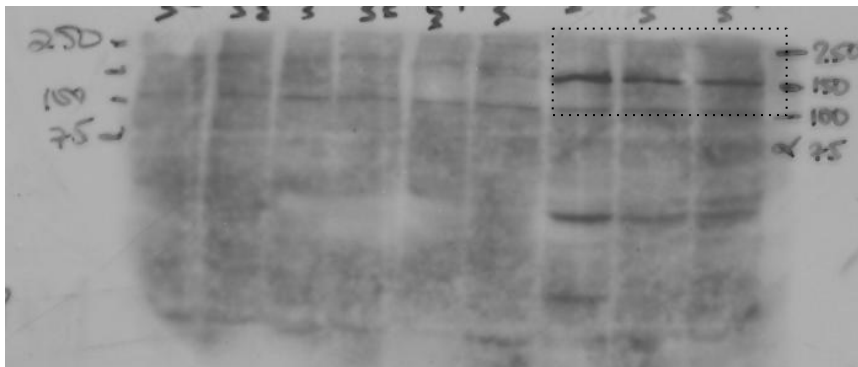

$\alpha$ -FLAG

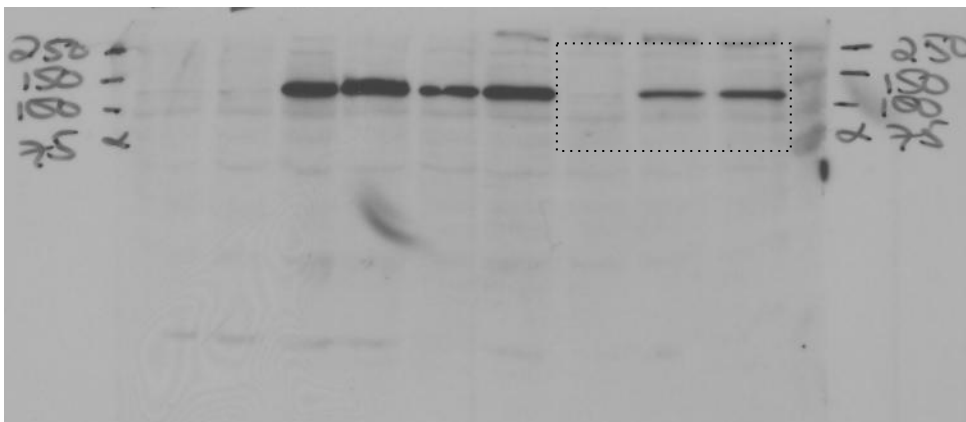

### Figure 3B

$\alpha$ -GFP

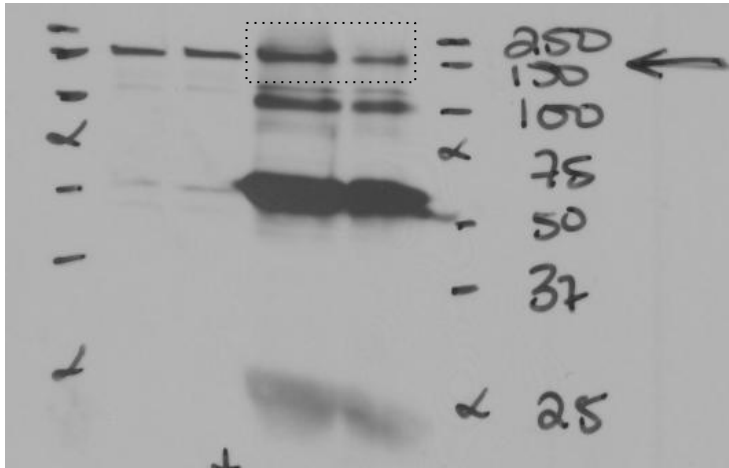

$\alpha$ -Flag

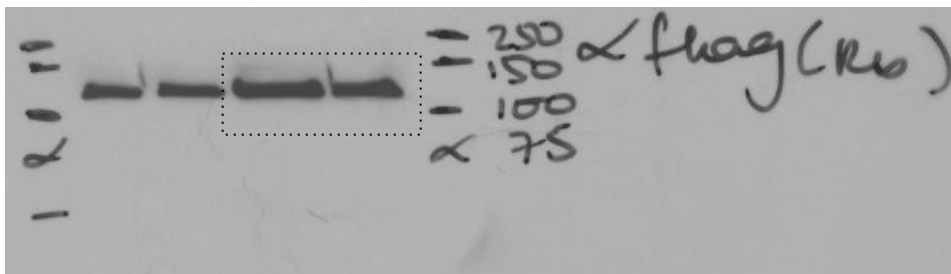

$\alpha$ -PRMT1

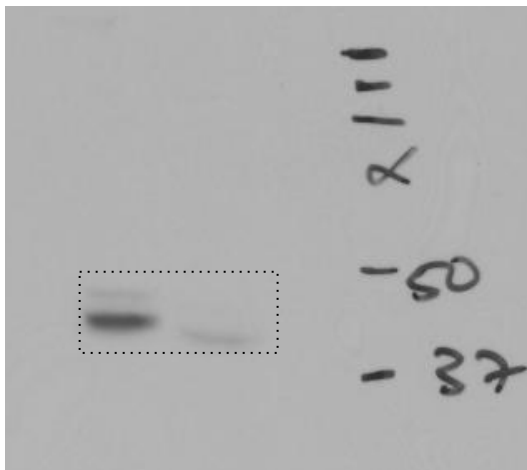

### Figure 3B

$\alpha$ -GFP

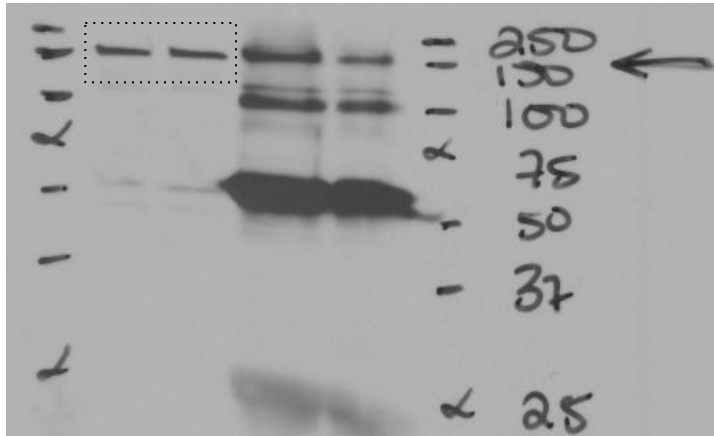

$\alpha$ -Flag

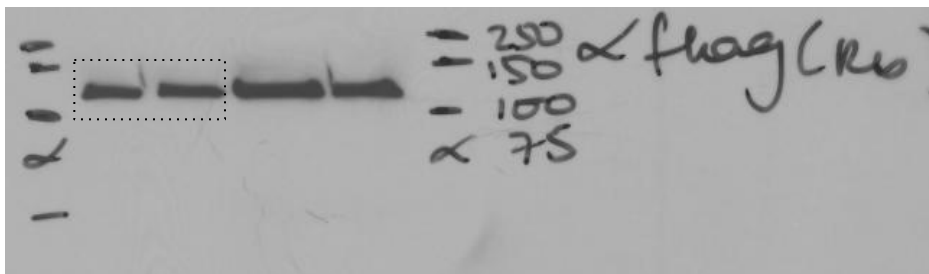

Supplement: srep10475-s1.pdf [file srep10475-s1.pdf]
